# Supplementary material
Source: publisher site journal article supplement (https://www.dovepress.com/get_supplementary_file.php?f=386829.docx)
Supplement: Supplementary file 1 [file get_supplementary_file.php]

**Risk Factors for Hepatic Encephalopathy**

**in Hepatocellular Carcinoma after Sorafenib or Lenvatinib Treatment:**

**A Real-World Study**

1, Bowen Chen; 2, Linzhi Zhang; 3, Jiamin Cheng; 4, Tong Wu; 5, Jin Lei;

6, Xu Yang; 7, Rongling Zhang; 8, Rifaat Safadi; 9,Yinyin Li; 10, Tongguo Si; 11, Yinying Lu

Table of contents

Fig. S1 2

Table S1 3

Table S2 4

Table S3 4

Fig. S2 5


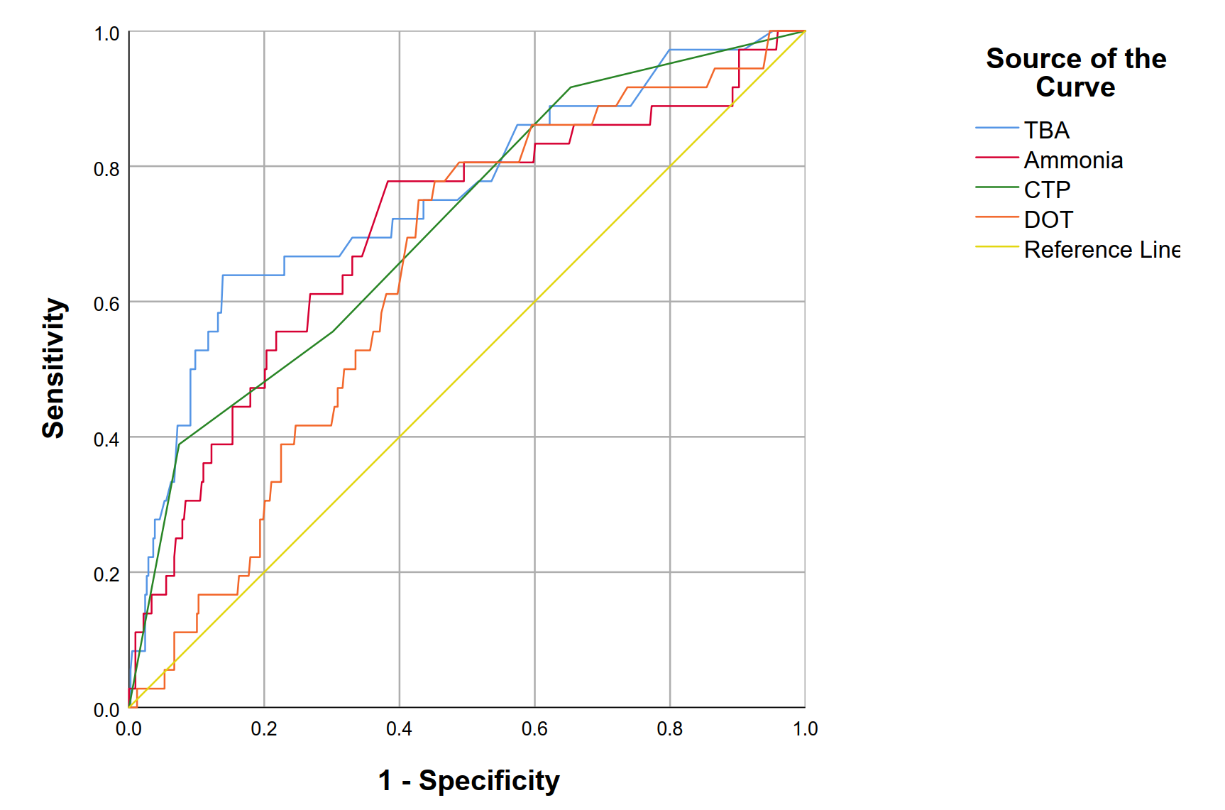


**Fig. S1. Receiver Operating Characteristic (ROC) curves for Exploring Best Cut-off Value in Predicting Hepatic Encephalopathy Model.**

Abbreviations in this figure: TBA: total bile acid; CTP: Child-Pugh; DOT: duration of treatment.

**Table S1. Clinical Outcomes of Patients.**

| **Variables** | **Sorafenib Group** | **Lenvatinib Group** |
| --- | --- | --- |
| **(n = 214, %)** | **(n = 240, %)** |
| Reasons for Treatment Discontinuation |  |  |
| Progression of Disease | 166 (77.6%) | 161 (67.1%) |
| Adverse Events | 19 (8.9%) | 50 (20.8%) |
| Rupture of Tumor | 2 (0.9%) | 4 (1.7%) |
| Conversion Therapy | 4 (1.9%) | 7 (2.9%) |
| Other Reasons | 3 (1.4%) | 2 (0.8%) |
| Combination of locoregional Therapy | 127 (59.3%) | 168 (70.0%) |

**Table S2. ROC Curves in Exploring Most Suitable Cut-Off Values.**

| **Variables** | **Cut-Off Value** | **Sensitivity** | **Specificity** | **AUC (95%CI)** | **P-value** |
| --- | --- | --- | --- | --- | --- |
| Ammonia (μmol/L) | 38.65 | 0.778 | 0.617 | 0.703 (0.607-0.799) | <0.001 |
| Total bile acid (μmol/L) | 29.5 | 0.639 | 0.861 | 0.755 (0.592-0.788) | <0.001 |
| Child-Pugh | 7.5 | 0.389 | 0.926 | 0.713 (0.624-0.802) | <0.001 |
| Duration of Treatment (months) | 5.6 | 0.75 | 0.572 | 0.641 (0.557-0.725) | 0.005 |
| Abbreviations in this table: ROC: receiver operating characteristic curve; AUC: area under curve; CI: confidence interval. | | | | | |

| **Table S3: Dynamic Changes of Serum Total Bile Acid and Ammonia 4-12 Weeks after Initiation of Treatment.** | | | | | | | | |
| --- | --- | --- | --- | --- | --- | --- | --- | --- |
|  | log2(TBA) (μmol/L)  at baseline | log2(TBA) (μmol/L) 4-12 weeks after initiation | t | *P*-value | log2(Ammonia) (μmol/L)  at baseline | | log2(Ammonia) (μmol/L) 4-12 weeks after initiation | t | | *P*-value |
| Sorafenib | 3.5 ± 1.6 | 3.1 ± 1.8 | 3.91 | <0.001 | 5.2 ± 0.6 | | 5.2 ± 0.8 | 0.92 | | 0.358 |
| Lenvatinib | 3.3 ± 1.5 | 3.7 ± 1.7 | -3.86 | <0.001 | 5.1 ± 0.7 | | 5.4 ± 0.9 | -3.7 | | <0.001 |
| Abbreviations in this table: TBA: total bile acid. | | | | | |

**
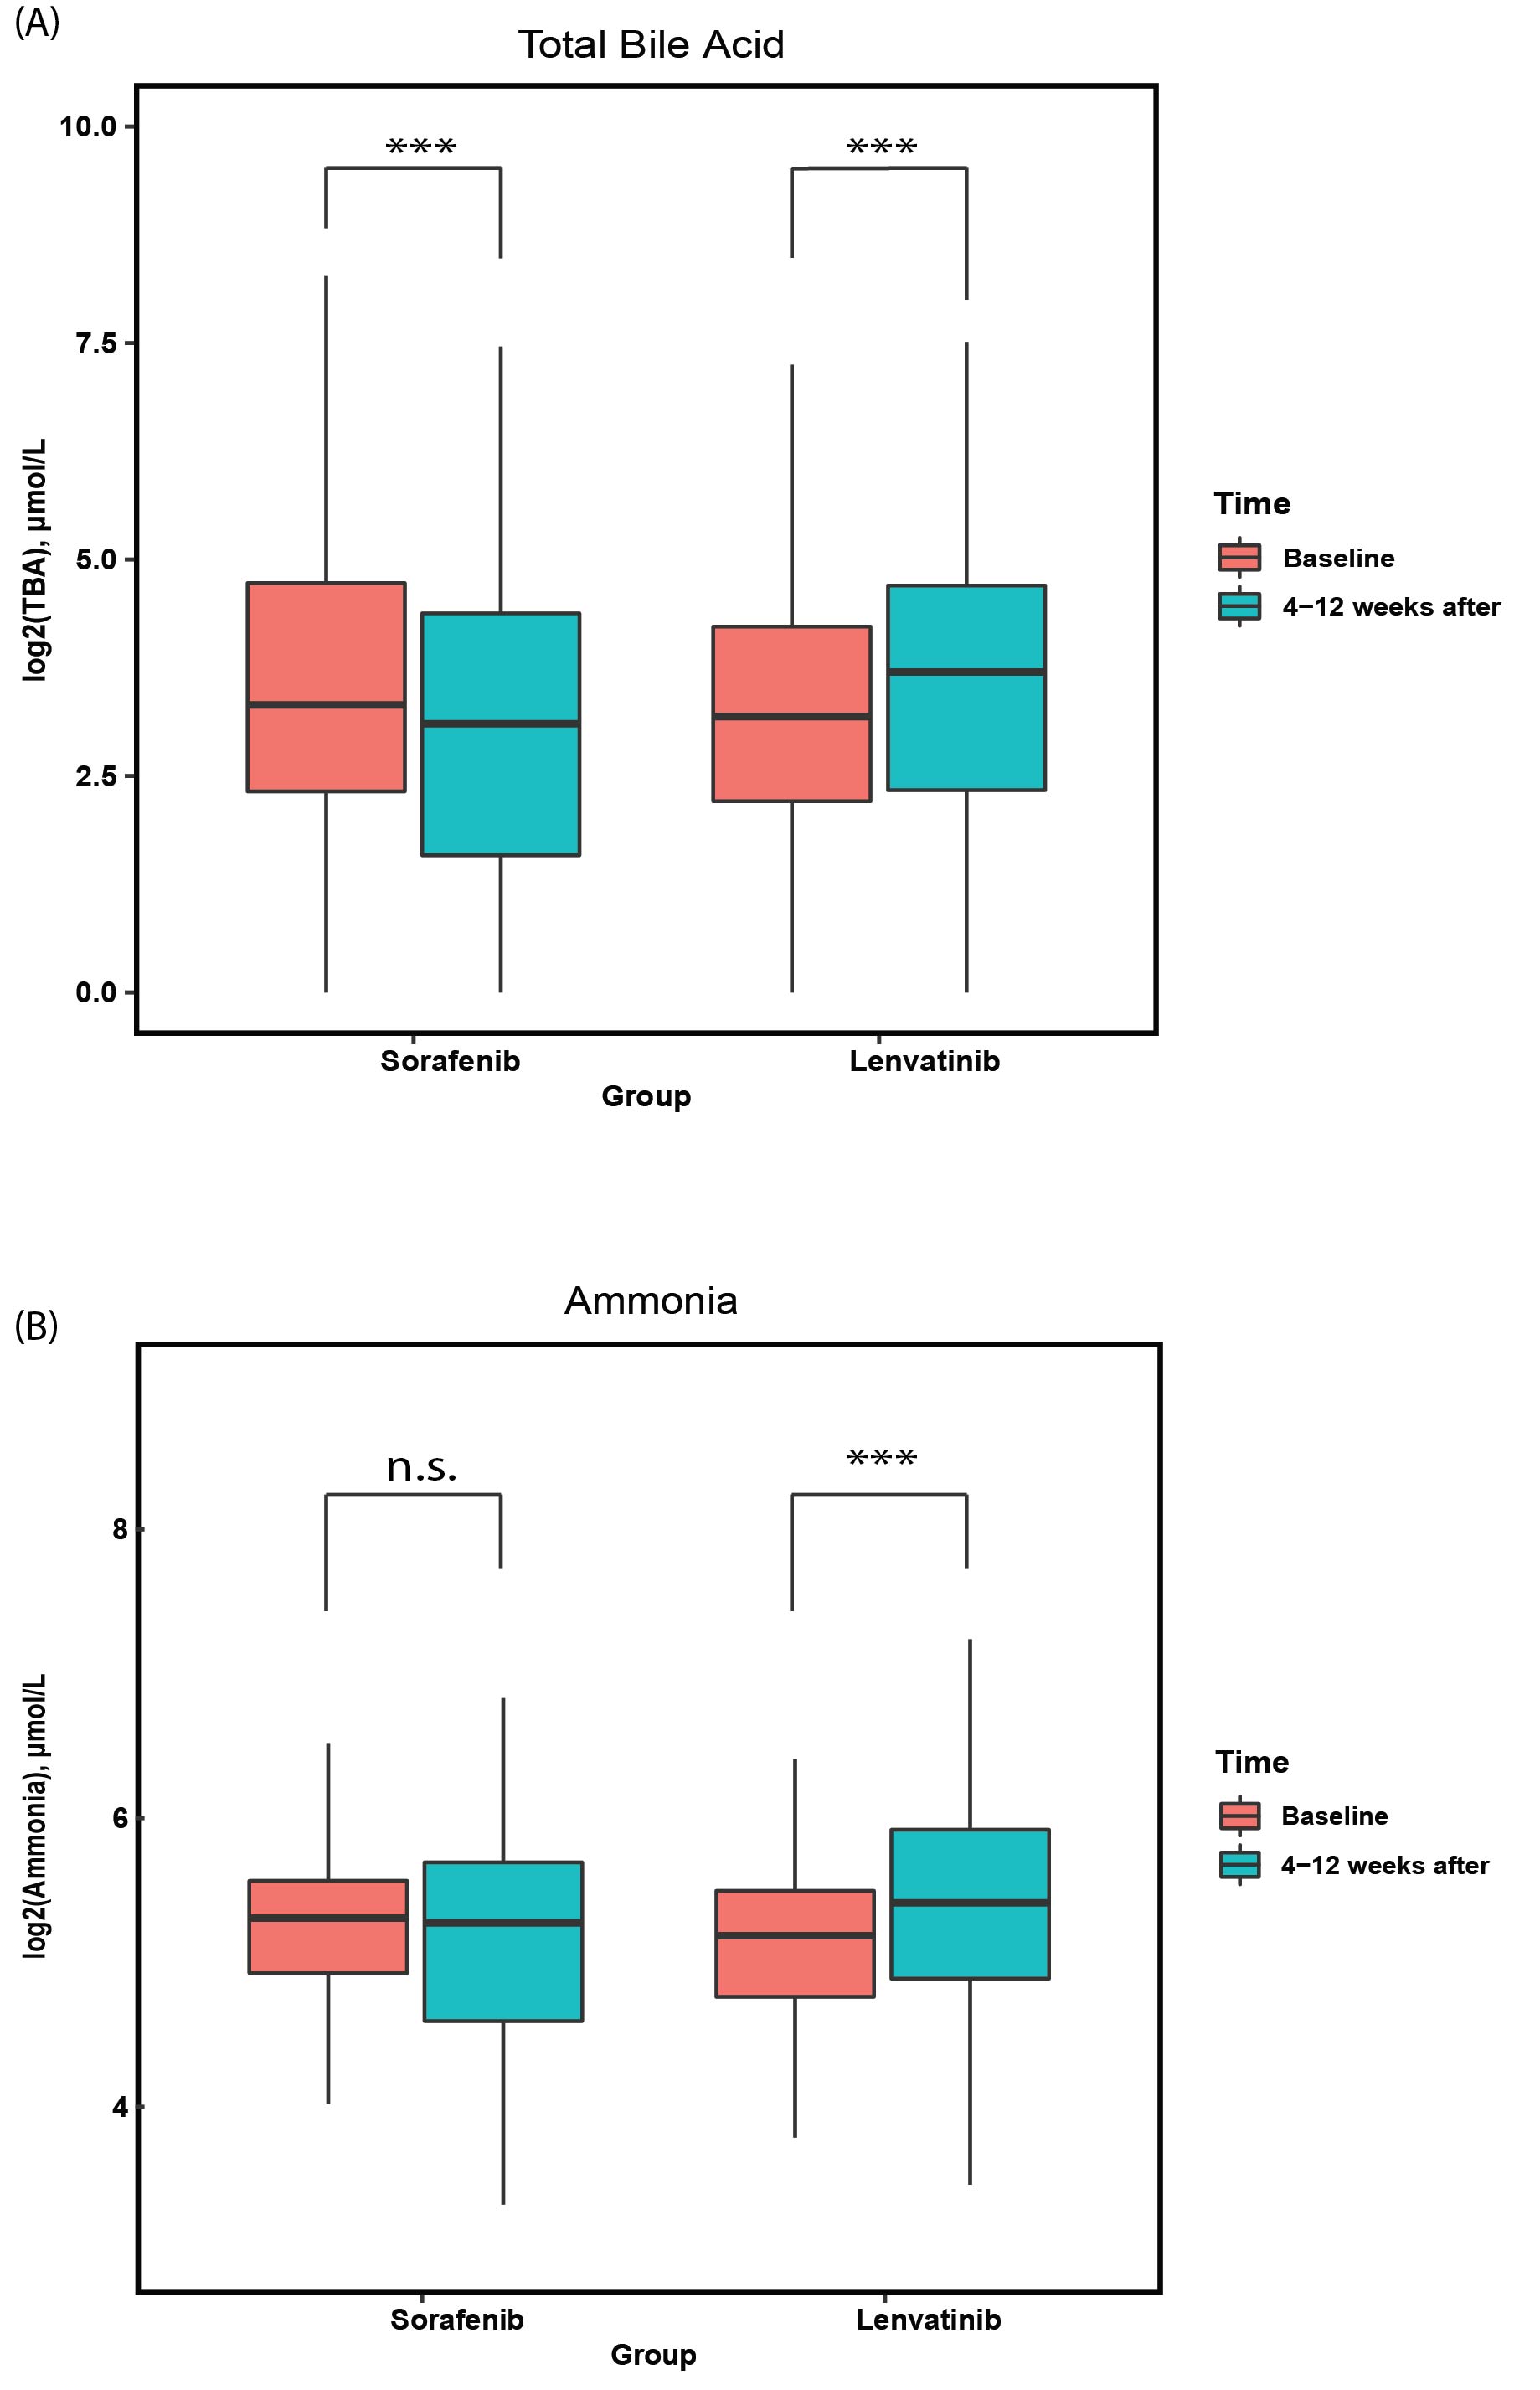
**

**Fig. S2. Boxplot Showing Dynamic Changes of Serum Total Bile Acid and Ammonia 4-12 Weeks after Initiation of Treatment.** (A) Change of Total Bild Acid; (B) Change of Ammonia. Levels of significance: *** P < 0.001; n.s.= not significant.
